# Supplementary material
Source: Springer Nature journal article supplement (https://www.springermedizin.de/resource/supplementary/12885_2014_5151_MOESM8_ESM.pdf/9468546)

**A**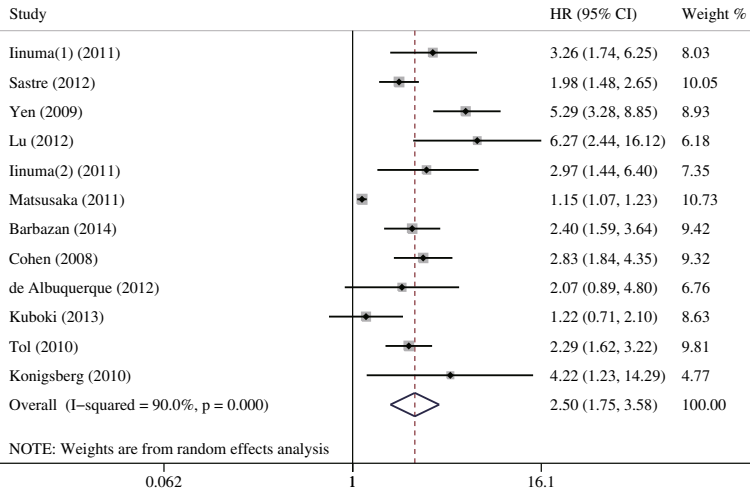**B**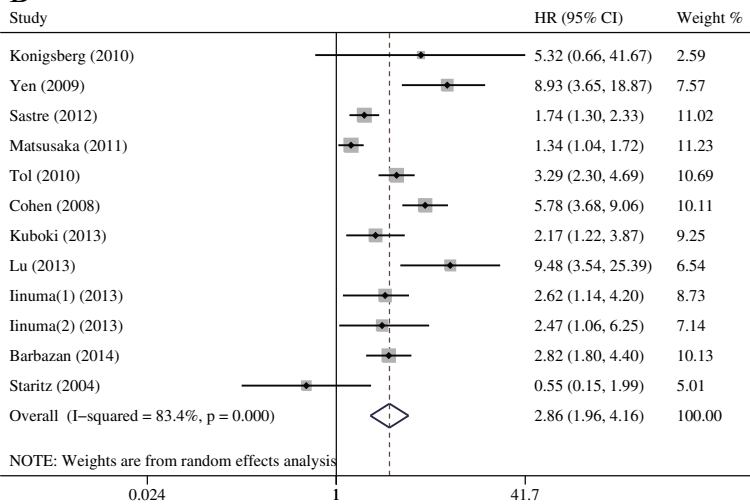

Supplement: MOESM8 [file 9468546]
